# Supplementary material
Source: PubMed Central journal article supplement (PMC6047028)
Supplement: ml8b00100_si_001.pdf [file ml8b00100_si_001.pdf]

## Supporting Information

# **Sweet Binders: Carbonic Anhydrase IX in Complex with Sucralose.**

Carrie L. Lomelino<sup>1</sup>, Akilah B. Murray<sup>1</sup>, Claudiu T. Supuran<sup>2</sup>, Robert McKenna<sup>1,\*</sup>

<sup>1</sup>Department of Biochemistry and Molecular Biology, College of Medicine, University of Florida, Gainesville, FL 32610, USA

<sup>2</sup>University of Florence, NEUROFARBA Department, Sezione di Farmaceutica e Nutraceutica, Via Ugo Schiff 6, 50019 Sesto Fiorentino (Florence), Italy

## Experimental Methods

CA IX-mimic was prepared as previously described by mutating seven active site residues of CA II in order to mimic the active site of CA IX.<sup>1,2</sup> The CA IX-mimic is more easily expressed and readily crystallizable than wild type CA IX and has been shown to maintain properties and interactions observed in wild type CA IX.<sup>3</sup> CA IX-mimic was expressed in BL21(DE3) competent cells and purified as previously described utilizing affinity chromatography with a *p*-(aminomethyl)benzenesulfonamide column.<sup>2</sup> Protein purity was verified via SDS-PAGE and the protein diluted to a concentration of 10 mg/mL. Crystals were then grown via the hanging drop vaporization method with a precipitant solution of 1.6 M Na-Citrate, 50 mM Tris, pH 7.8. Crystal growth was observed after 5 days. CA IX-mimic crystals were soaked in ~10 mM of sucralose 24 hrs prior to freezing. Crystals were transferred into a cryoprotectant solution of 20% glycerol and frozen in liquid nitrogen for shipment.

X-ray diffraction data was collected at the Cornell High Energy Synchrotron Source (CHESS) F1 beamline with a wavelength of 0.977 Å. Data sets were collected using a Pilatus 6M detector with a crystal-to-detector distance of 270 mm, 1° oscillation angle, and exposure time of 4 sec per image. A total of 180 images were collected. The data were indexed, integrated, and scaled using *HKL2000*. Data was scaled to the monoclinic P2<sub>1</sub> space group (crystallography statistics in Supplementary Table 1). Phases were determined via molecular replacement using PDB: 3KS3 as a search model. Refinements and ligand restraint files were generated in the program *Phenix*<sup>4</sup>. Modification to Models and ligand PDB files were performed in *Coot*<sup>5</sup>, along with the measurement of bond lengths for observable interactions. All figures were generated using *PyMol*<sup>6</sup>.

**Supplementary Table 1.** X-ray crystallography statistics

| <b>Sample</b>                                                                  | <b>CA IX-mimic Sucralose</b>                     |
|--------------------------------------------------------------------------------|--------------------------------------------------|
| <b>PDB Accession Code</b>                                                      | 6CJV                                             |
| <b>Space Group</b>                                                             | P2 <sub>1</sub>                                  |
| <b>Cell Dimensions (Å;°)</b>                                                   | $a = 41.83, b = 41.46, c = 71.73; \beta = 103.9$ |
| <b>Resolution (Å)</b>                                                          | 31.90 – 1.53 (1.56 – 1.53)                       |
| <b>Total Reflections</b>                                                       | 48136                                            |
| <b>I/σ</b>                                                                     | 23.7 (2.1)                                       |
| <b>Redundancy</b>                                                              | 3.1 (2.9)                                        |
| <b>Completeness (%)</b>                                                        | 99.8 (99.7)                                      |
| <b>R<sub>cryst</sub> (%)</b>                                                   | 16.4 (22.9)                                      |
| <b>R<sub>free</sub> (%)</b>                                                    | 18.5 (24.3)                                      |
| <b>R<sub>pim</sub> (%)</b>                                                     | 2.8 (37.1)                                       |
| <b># of Protein Atoms</b>                                                      | 2077                                             |
| <b># of Water Molecules</b>                                                    | 187                                              |
| <b># of Ligand Atoms</b>                                                       | 23                                               |
| <b>Ramachandran Stats (%): Favored, Allowed, Generously Allowed</b>            | 96.5, 3.5, 0.0                                   |
| <b>Avg. B factors (Å<sup>2</sup>): Main-Chain, Side-Chain, Solvent, Ligand</b> | 16.6, 21.5, 27.6, 44.5                           |
| <b>rmsd for Bond Lengths, Angles (Å,°)</b>                                     | 0.008, 1.593                                     |

Data in parentheses correspond to the highest resolution shell

$$R_{\text{cryst}} = (\sum |F_o - F_c| / \sum |F_o|) \times 100$$

$R_{\text{free}}$  is calculated similarly to  $R_{\text{cryst}}$  using data omitted from refinement (5%)

$$R_{\text{pim}} = \sum_{hkl} \{1/[N(hkl) - 1]\}^{1/2} \times \sum_i |I_i(hkl) - \langle I(hkl) \rangle| / \sum_{hkl} \sum_i I_i(hkl)$$

## References

- (1) Genis, C.; Sippel, K. H.; Case, N.; Cao, W.; Avvaru, B. S.; Tartaglia, L. J.; Govindasamy, L.; Tu, C.; Agbandje-McKenna, M.; Silverman, D. N.; et al. Design of a Carbonic Anhydrase IX Active-Site Mimic to Screen Inhibitors for Possible Anticancer Properties. *Biochemistry (Mosc.)* **2009**, *48* (6), 1322–1331.
- (2) Pinard, M. A.; Boone, C. D.; Rife, B. D.; Supuran, C. T.; McKenna, R. Structural Study of Interaction between Brinzolamide and Dorzolamide Inhibition of Human Carbonic Anhydrases. *Bioorg. Med. Chem.* **2013**, *21* (22), 7210–7215.
- (3) Mahon, B. P.; Bhatt, A.; Socorro, L.; Driscoll, J. M.; Okoh, C.; Lomelino, C. L.; Mboge, M. Y.; Kurian, J. J.; Tu, C.; Agbandje-McKenna, M.; et al. The Structure of Carbonic Anhydrase IX Is Adapted for Low-PH Catalysis. *Biochemistry (Mosc.)* **2016**, *55* (33), 4642–4653.
- (4) Adams, P. D.; Afonine, P. V.; Bunkóczi, G.; Chen, V. B.; Davis, I. W.; Echols, N.; Headd, J. J.; Hung, L.-W.; Kapral, G. J.; Grosse-Kunstleve, R. W.; et al. PHENIX: A Comprehensive Python-Based System for Macromolecular Structure Solution. *Acta Crystallogr. D Biol. Crystallogr.* **2010**, *66* (2), 213–221.
- (5) Emsley, P.; Cowtan, K. Coot: Model-Building Tools for Molecular Graphics. *Acta Crystallogr. D Biol. Crystallogr.* **2004**, *60* (Pt 12 Pt 1), 2126–2132.
- (6) The PyMOL Molecular Graphics System, Version 1.5.0.4 Schrödinger, LLC.
